# Supplementary material for: Strong electrochemiluminescent interactions between carbon nitride nanosheet–reduced graphene oxide nanohybrids and folic acid, and ultrasensitive sensing for folic acid
Source: Royal Society of Chemistry journal article supplement (doi:10.1039/c6an00664g), 2016-01-01
Supplement: c6an00664g1.pdf [file c6an00664g1.pdf]

## **Electronic Supplementary Information (ESI)**

### **Strong electrochemiluminescent interactions between carbon nitride nanosheets-reduced graphene oxide nanohybrids and folic acid, and ultrasensitive sensing for folic acid**

*Chen Zhou, Yingmei Chen, Pengxiang Shang, Yuwu Chi\**

MOE Key Laboratory of Analysis and Detection Technology for Food Safety, Fujian Provincial Key Laboratory of Analysis and Detection Technology for Food Safety, and College of Chemistry, Fuzhou University, Fujian 350108, China

\*Corresponding author. Tel/Fax: +86 591 22866137. E-mail: y.w.chi@fzu.edu.cn (Y. Chi).

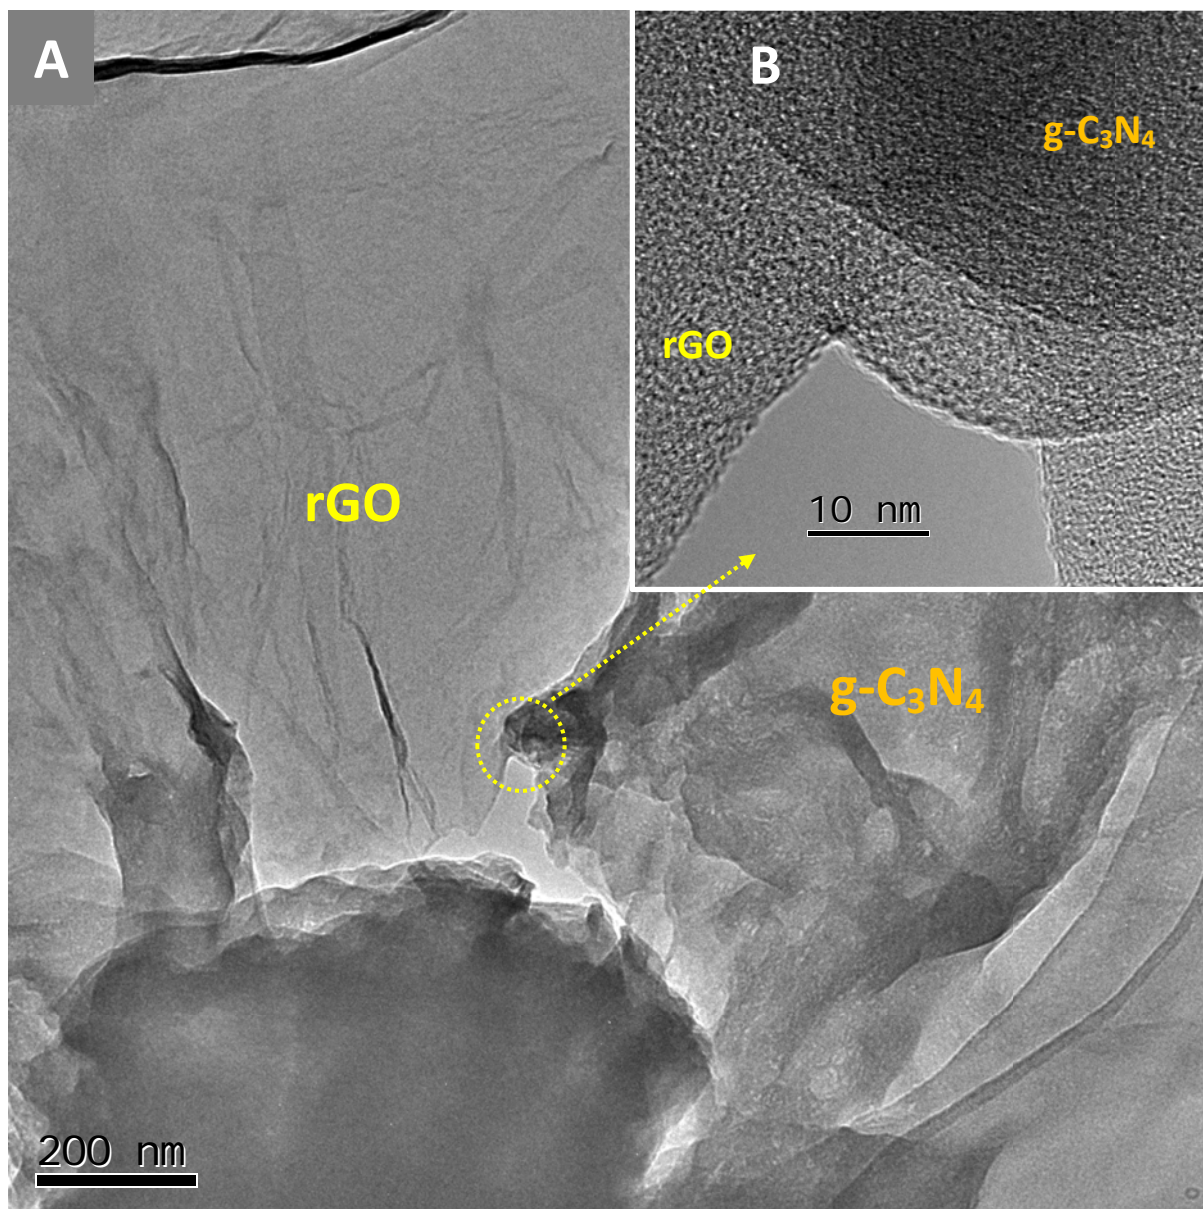

**Figure S1.** TEM (A) and HRTEM (B) images of g-C<sub>3</sub>N<sub>4</sub> NSs-rGO nanohybrids.

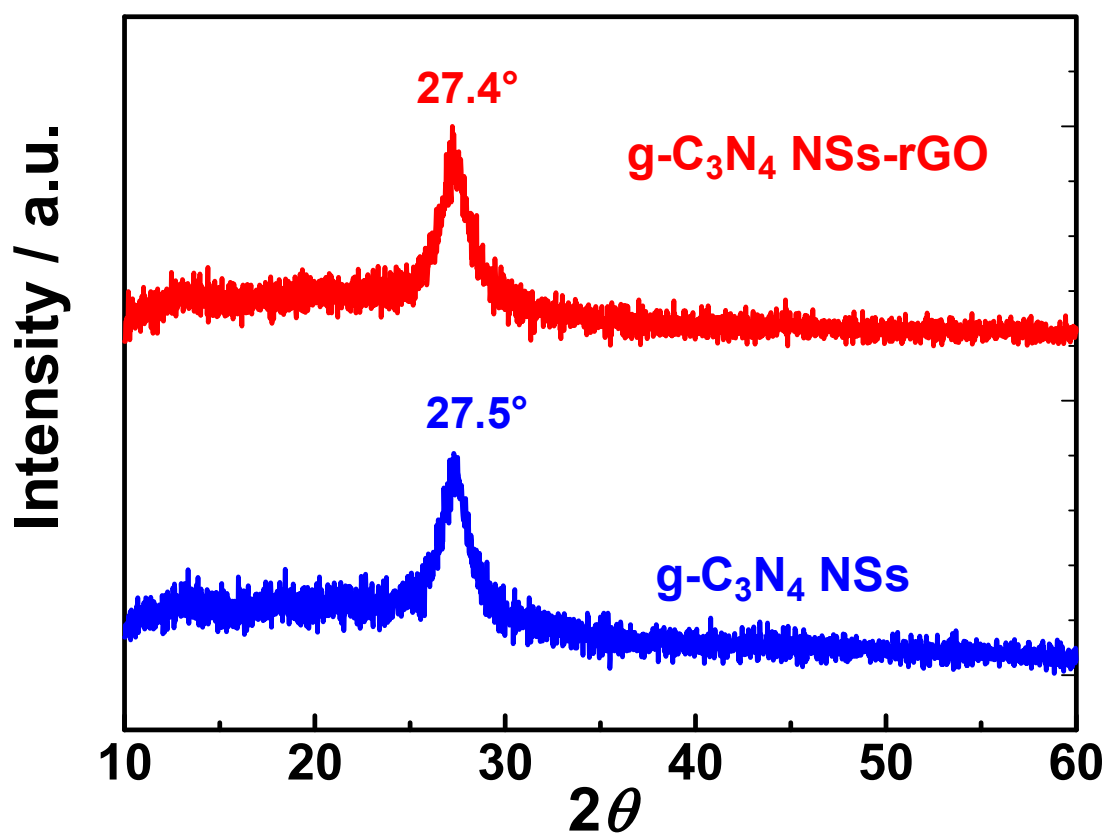

**Figure S2.** XRD patterns of g-C<sub>3</sub>N<sub>4</sub> NSs and g-C<sub>3</sub>N<sub>4</sub> NSs-rGO nanohybrids.

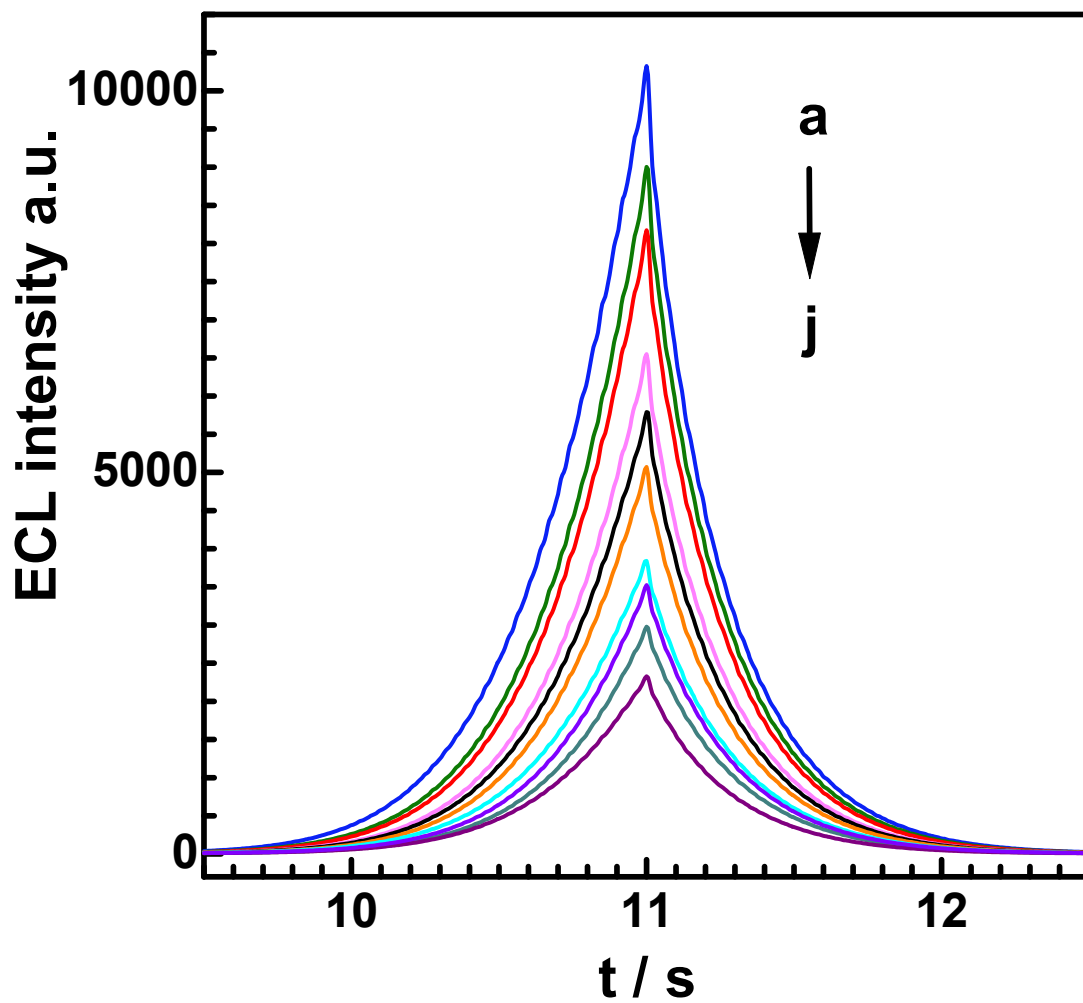

**Figure S3.** ECL responses of the sensor to FA at various concentrations (from curves (a) to (j): 0.1, 0.4, 0.7, 1, 4, 7, 10, 40, 70, 90 nM). Concentration of  $K_2S_2O_8$ : 0.1M; pH=7; potential window: -1.1 to 0 V; scan rate: 0.1V/s).
